# Supplementary material for: Species-specific interaction of EA1 with the maize pollen tube apex
Source: PubMed Central journal article supplement — Plant Signal Behav. 2013 Jul 18;8(10):e25682. doi: 10.4161/psb.25682 (PMC4091058; doi:10.4161/psb.25682), 2013-07-18
Supplement: psb-8-e25682-s01.pdf [file psb-8-e25682-s01.pdf]

## **Supplemental Material to:**

**Susanne Uebler, Thomas Dresselhaus, Mihaela Márton**

**Species-specific interaction of EA1 with the maize pollen  
tube apex**

**Plant Signaling & Behavior 2013; 8(10)**

**<http://dx.doi.org/10.4161/psb.25682>**

**[www.landesbioscience.com/journals/psb/article/25682](http://www.landesbioscience.com/journals/psb/article/25682)**

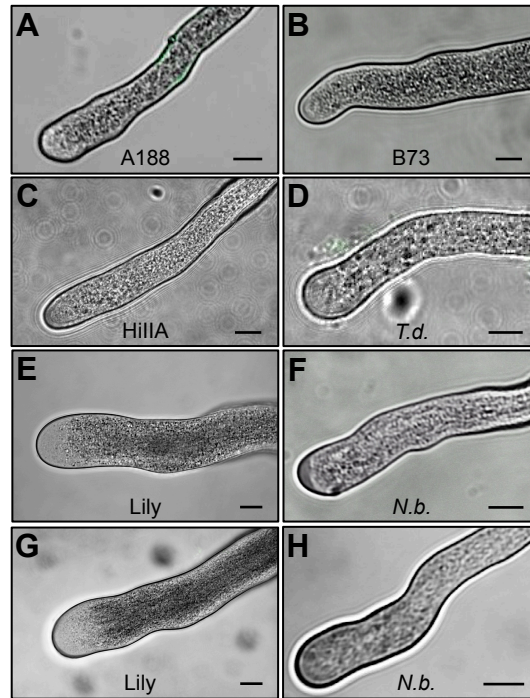

**Figure S1.** EA1-related EAL2 peptide does not interact with maize and *Tripsacum dactyloides* pollen tube tips. Moreover, lily (*Lilium* “Stargazer”) and tobacco (*N. benthamiana*) pollen tubes are neither bound by EA1 nor EAL2, respectively. *In vitro* pollen tube binding assays of the maize inbred lines A188, B73 and HillA, *Tripsacum dactyloides* (*T.d.*), lily and *Nicotiana benthamiana* (*N.b.*) were performed as controls at the same concentration and condition like in Figure 1 either with synthetic predicted mature EAL2 (**A**, **B**, **C**, **D**, **E** and **F**) or EA1 (**G** and **H**) peptides both labeled with the green fluorophore DyLight 488 NHS Ester. Each panel shows merged micrographs of bright field and fluorescence Z-projections of confocal image stacks of 10 to 20 μm thick sections, respectively. Scale bars represent 10 μm.

## SUPPLEMENTARY MATERIALS

### Chemical labeling of synthetic peptides

Predicted mature EA1 peptide of 49 amino acids<sup>1</sup> was chemically synthesized with 80%-90% HPLC-purity by Centic Biotec. Successful synthesis of the linear peptide was shown by LC-MS. Chemically labeling of the synthetic EA1 peptide was performed with fluorophore DyLight 488 NHS Ester (Thermo Scientific) according to the manufacturer's protocol with a number of modifications. 0.5 mg peptide was first dissolved in 100% DMSO and then diluted stepwise in 0,1 M sodium phosphate, 0,15 NaCl (pH 7,4) to a final concentration of 1% DMSO. The protein solution was mixed with an aliquot of the fluorophore DyLight 488 NHS Ester. After 1.5 h incubation at room temperature the mixture was dialyzed against 0,1 M sodium phosphate, 0,15 NaCl (pH 7,4) with a final concentration of DMSO not exceeding 1% using a Slide-A-Lyzer® MINI Dialysis Unit (Thermo Scientific). Precipitates were removed by centrifugation at 10.000 rcf. Predicted mature EAL2 consisting of 52 amino acids<sup>2</sup> was chemically synthesized with 80%-90% HPLC-purity by Centic Biotec. The chemical labeling of the peptide was performed using the same method described above.

### Pollen tube binding assay

The pollen tube binding assay was conducted as follows: in order to obtain pollen tubes, pollen grains of maize inbred lines or *Tripsacum dactyloides* were shaken shortly after anthesis directly onto 10 µl droplets of 1xPGM<sup>3</sup> containing a final concentration of 1% DMSO placed in a 35 mm plastic Petri dish. Pollen of *Nicotiana benthamiana* was transferred directly from a freshly opened anther onto drops of 1xPGM with 1% DMSO using forceps. Pollen of lily was directly taken one day after anthesis, dried at room temperature for at least 1 day and transferred directly into 1,5 ml of 1xPGM containing 1% DMSO in a 25 mm plastic Petri dish using forceps. Germination of maize and *T. dactyloides* pollen was performed for 30 to 45 min, while *N. benthamiana* pollen was germinated for 60 to 90 minutes and lily pollen over night for 14-15 hours. All incubations were performed at room temperature. Further on, 1 µl of chemically labeled EA1 or EAL2 were added to each droplet containing germinated pollen of maize, *T. dactyloides* or *N. benthamiana*. Germinated lily pollen were transferred step by step onto an object slide using a cut pipette tip and the media was removed to concentrate pollen into a final volume of 100 µl. Subsequently 10 µl of chemically labeled peptide were

added. After incubation of germinated pollen of maize, *T. dactyloides* and *N. benthamiana* the content of each droplet was transferred carefully using a cut pipette tip onto an object slide, to which 1xPGM containing 1% DMSO was added to a final volume of 200  $\mu$ l. Samples were then washed on the object slide very carefully 3 times using each time 200  $\mu$ l 1xPGM with 1% DMSO and resuspended in 500  $\mu$ l 1xPGM with 1% DMSO. Microscopic analysis was initiated immediately after washing using a Zeiss Axiovert 200M LSM 510 META confocal laser scanning microscope.

## References

1. Márton M-L, Dresselhaus T. Female gametophyte-controlled pollen tube guidance. *Biochemical Society Transactions* 2010; 38:627.
2. Dresselhaus T, Lausser A, Márton ML. Using maize as a model to study pollen tube growth and guidance, cross-incompatibility and sperm delivery in grasses. *Ann Bot* 2011; 108:727-37.
3. Schreiber DN, Dresselhaus T. In vitro pollen germination and transient transformation of *Zea mays* and other plant species. *Plant Molecular Biology Reporter* 2003; 21:31-41.
